# Supplementary material for: Enhancement of pressure-free bonding with Cu particles by the addition of Cu–Ni alloy nanoparticles
Source: Royal Society of Chemistry journal article supplement (doi:10.1039/c4tc00240g), 2014-01-01
Supplement: c4tc00240g1.pdf [file c4tc00240g1.pdf]

Electronic Supplementary Information (ESI)

## Enhancement of pressure-free bonding with Cu particles by the addition of Cu-Ni alloy nanoparticles

Ryota Watanabe and Toshitaka Ishizaki\*

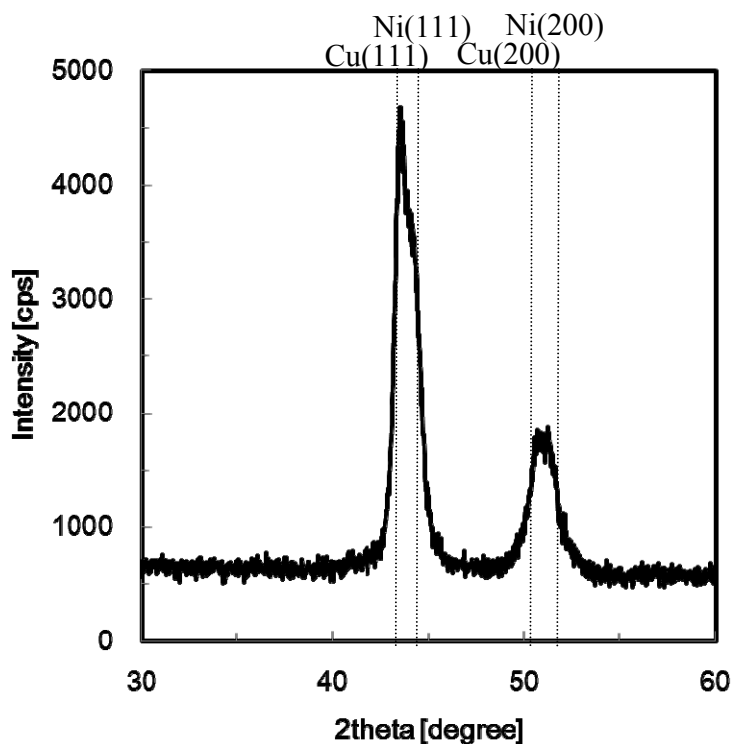

Fig. S1 XRD pattern of the product synthesized by one-pot one step process: the mixture of 1.7 mmol of  $\text{Cu}(\text{acac})_2$ , 1.7 mmol of  $\text{NiCl}_2$ , 30 mmol of OA and 2.4 mmol of TOP was reacted at  $200^\circ\text{C}$  for 2 h. Broken lines are the peaks of Cu (JCPDF Card File 04-0836) and Ni (JCPDF Card File 04-0850).

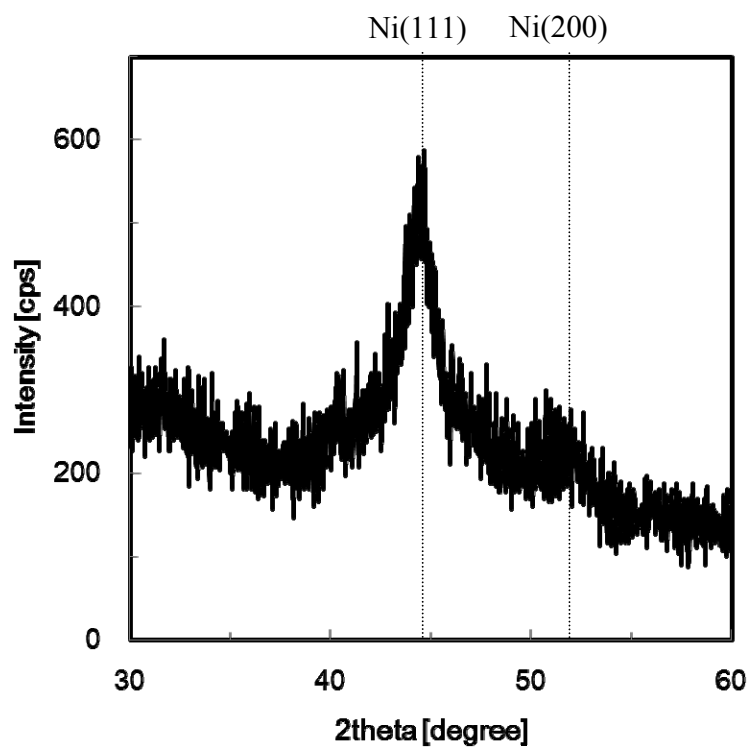

Fig. S2 XRD pattern of the product synthesized by reaction of mixture 3.6 mmol of  $\text{NiCl}_2$ , 30 mmol of OA and 2.4 mmol of TOP at  $200^\circ\text{C}$  for 1 h. Broken lines are the peaks of Ni (JCPDF Card File 04-0850).

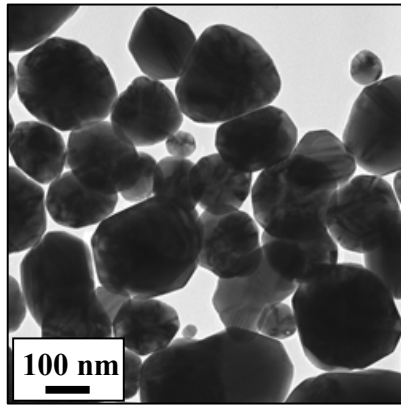

Fig. S3 TEM images of CuPs.

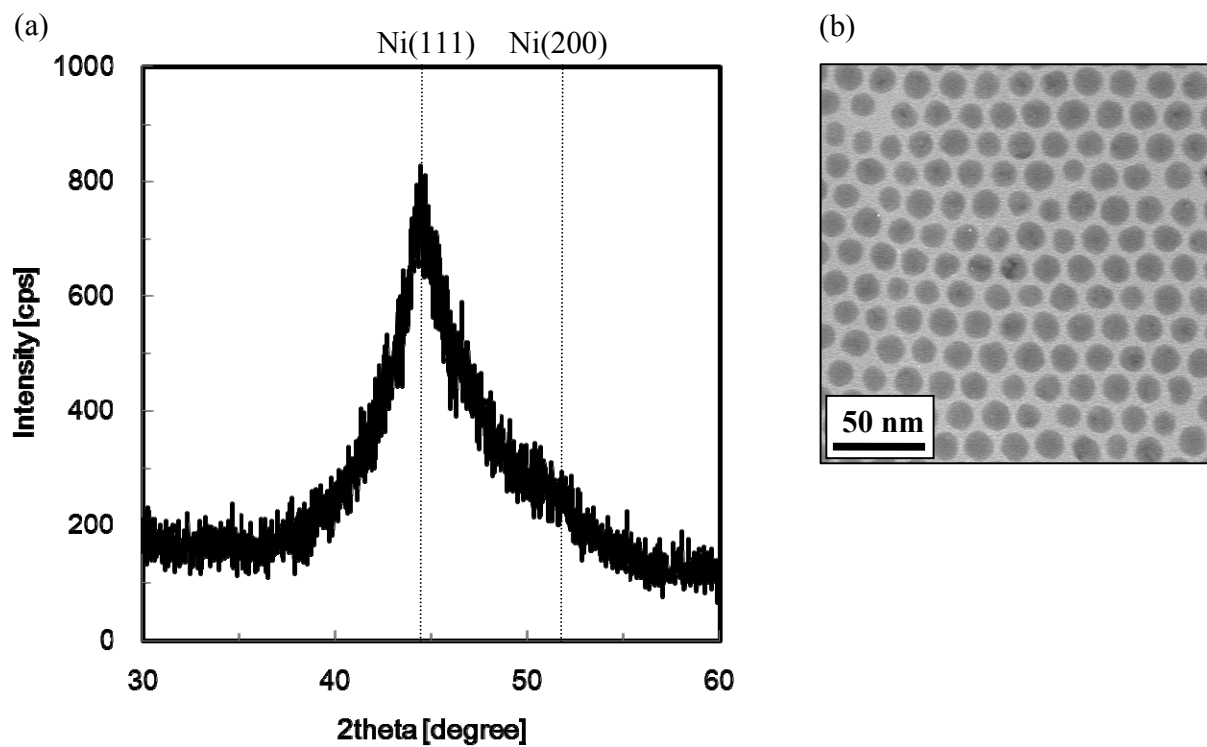

Fig. S4 (a) XRD pattern and (b) XRD pattern of NiNPs. Broken lines are the peaks of Ni (JCPDF Card File 04-0850).

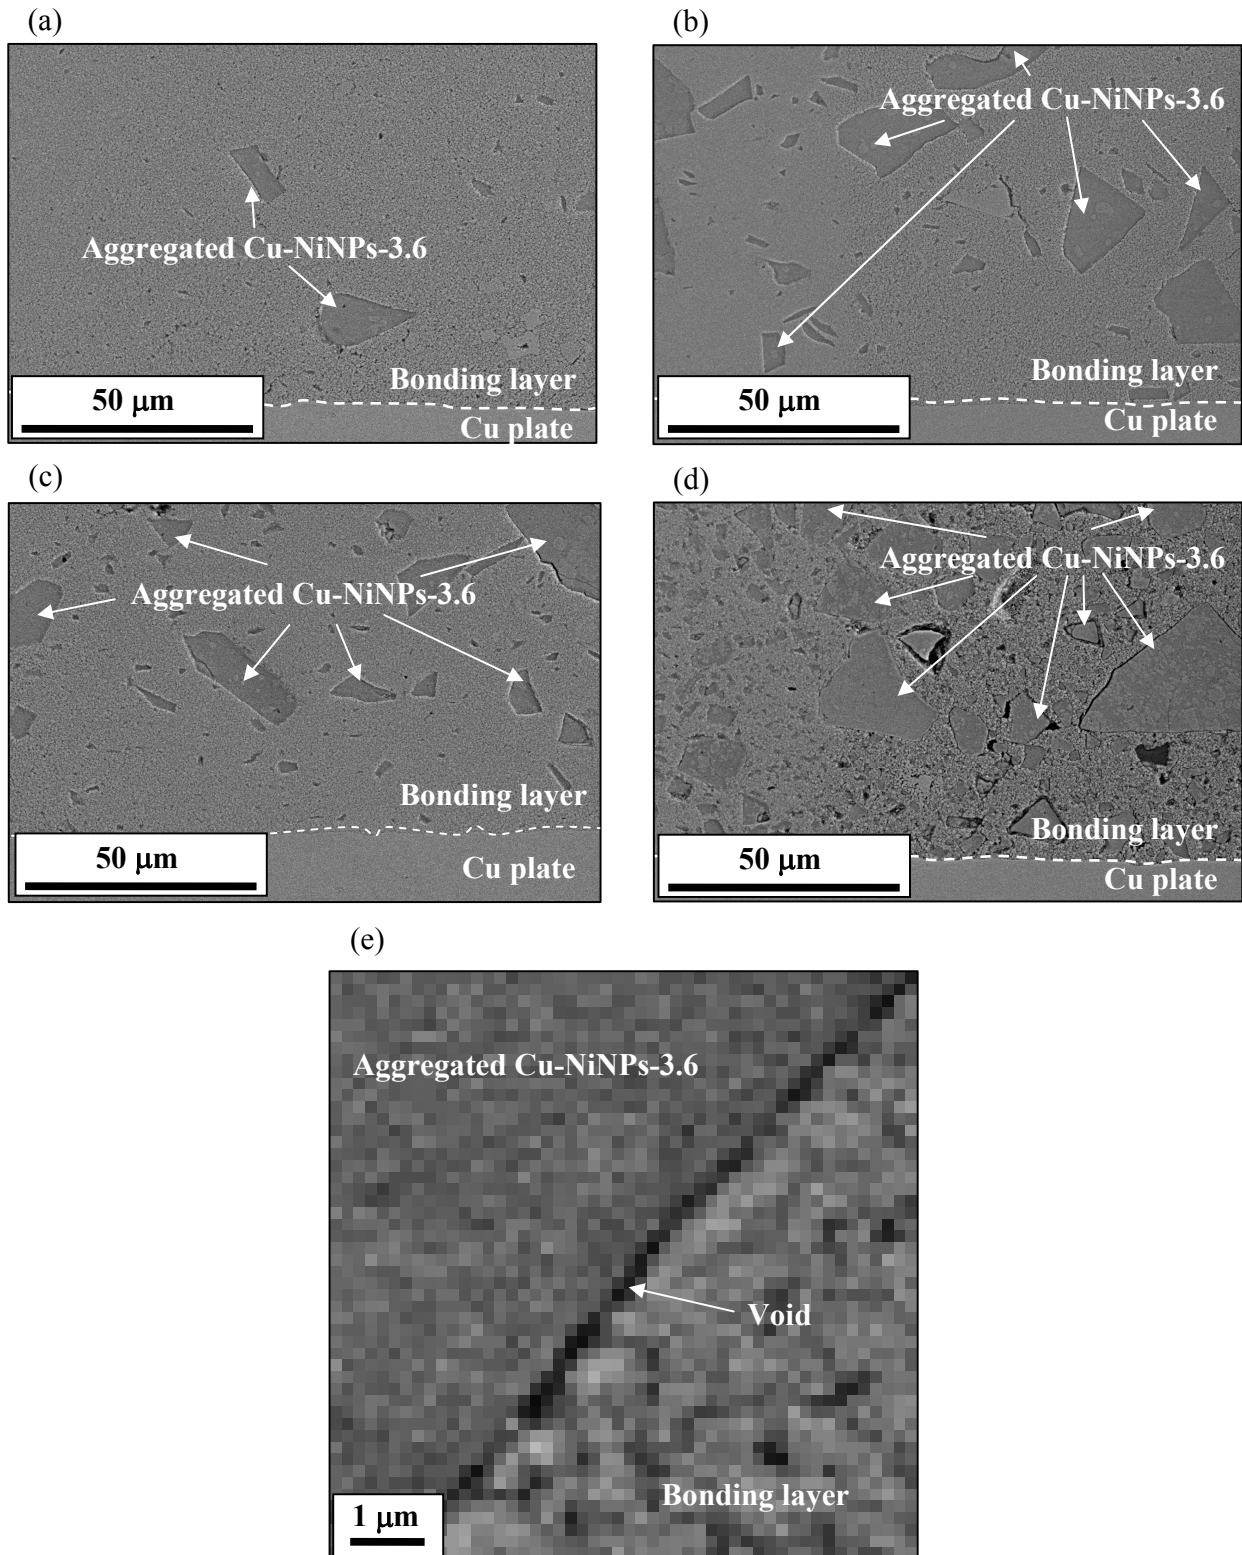

Fig. S5 Low-magnified SEM images of the interface of the Cu plates bonded by CuPs pastes containing (a) 5 wt%, (b) 10 wt%, (c) 20 wt% and (d) 40 wt% of Cu-NiNPs-3.6 at 250°C, and (e) magnified SEM image of interface between an aggregation of Cu-NiNPs-3.6 and the bonding layer.

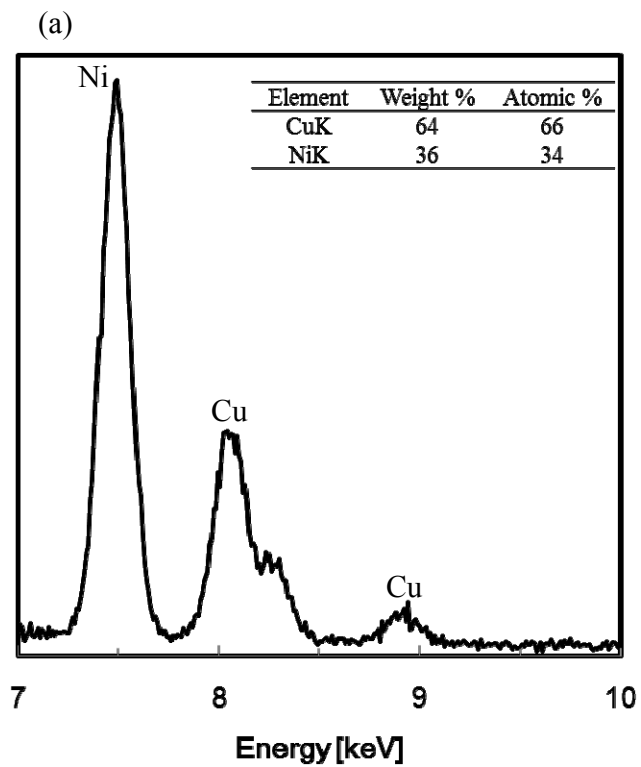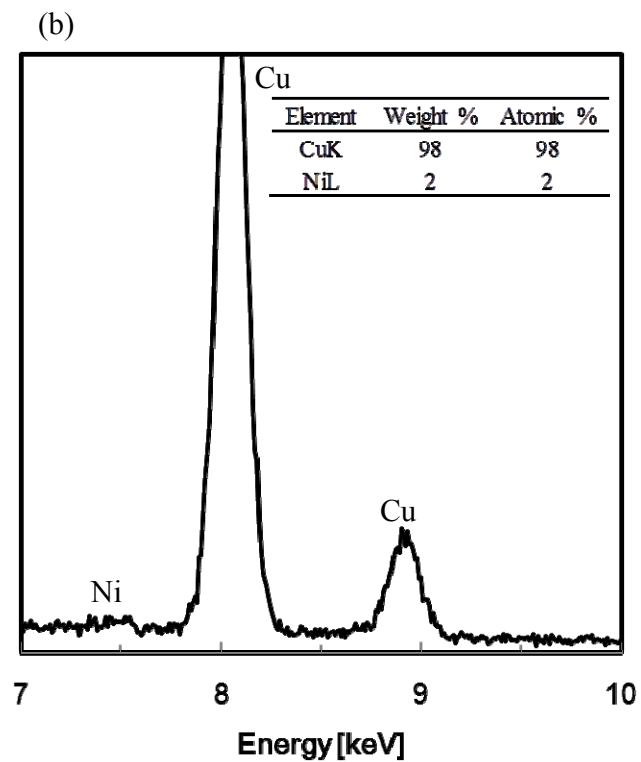

Fig. S6 EDX spectra of (a) the aggregated Cu-NiNPs-3.6 and (b) the bonding layer.

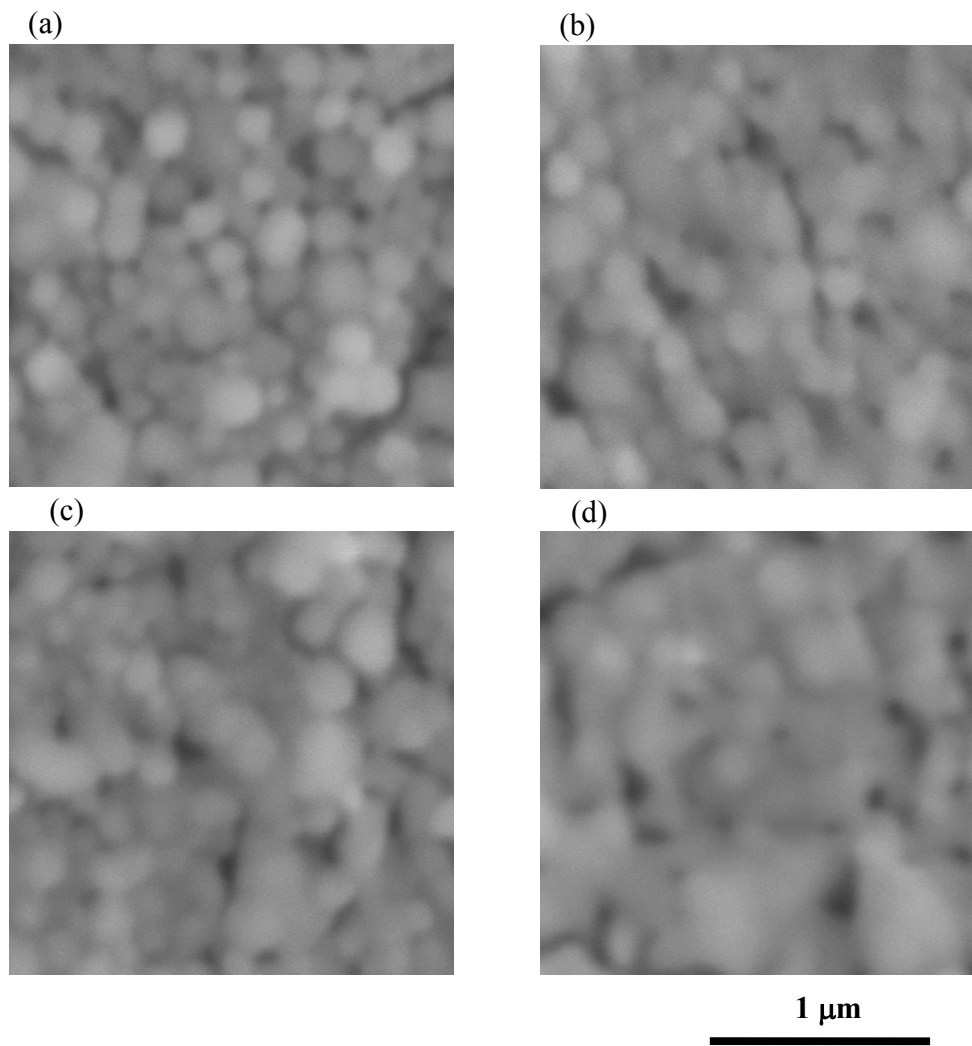

Fig. S7 SEM images of the sintered films prepared using (a, b) the single CuPs paste and (c, d) the CuPs paste containing 5 wt% of Cu-NiNPs-3.6. The sintering temperature are (a, c) 250°C and (b, d) 300°C.
